# Supplementary material for: Peposertib, a DNA-PK Inhibitor, Enhances the Anti-Tumor Efficacy of Topoisomerase II Inhibitors in Triple-Negative Breast Cancer Models
Source: MDPI journal article supplement (doi:10.3390/ijms25105120), 2024-05-08
Supplement: s1 [file s1]

## Supplementary Figures and Tables

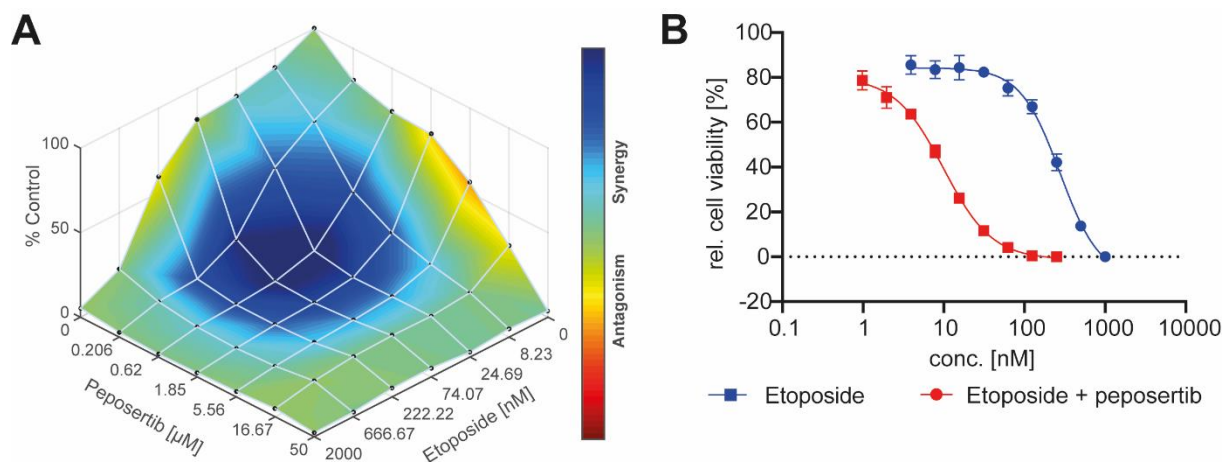

**Suppl figure S1. Pepsosertib exhibits synergistic antiproliferative activity with etoposide.** (A) Overlays of Bliss synergy matrices on combination dose response MDA-MB-231 cell line treated with etoposide and pepsosertib for 168 h. (B) Potentiation of etoposide cytotoxicity by 1  $\mu\text{M}$  pepsosertib on MDA-MB-231 cells as measured using an Resazurin/ Alamar Blue viability assay at 168 h post treatment.

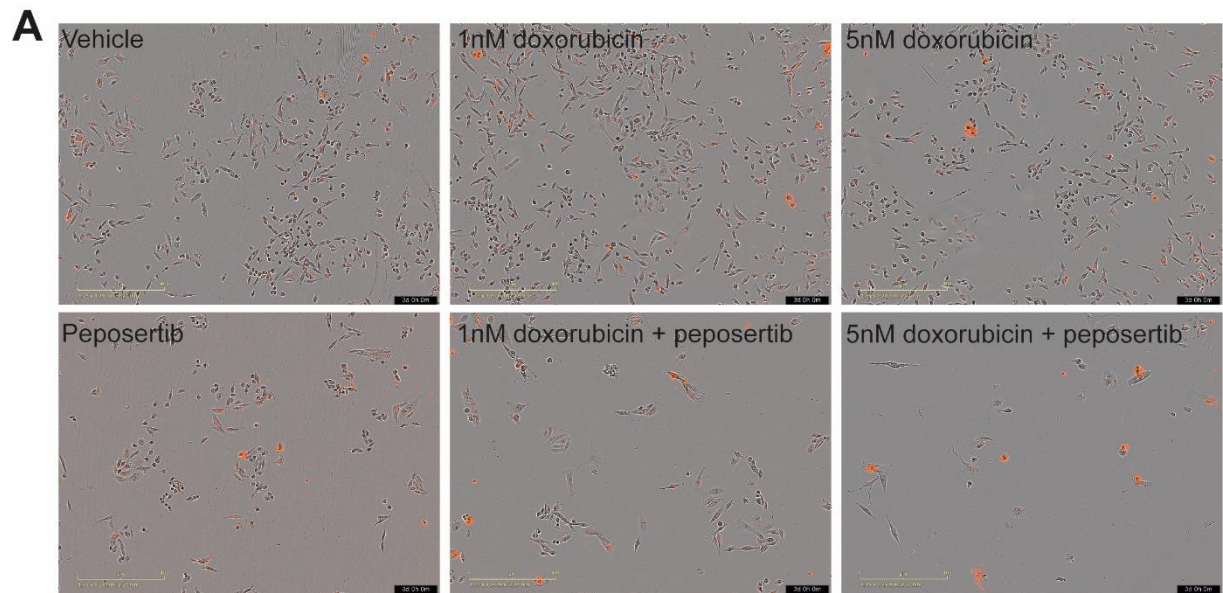

**Suppl. figure S2. Peposertib, in combination with doxorubicin, affect cell proliferation and induce apoptosis in TNBC cell line.** (A) Incucyte® bright-field images of MDA-MB-231 at 72 hours post treatment at 10x magnification overlay with AnnexinV-Red staining. Images are representative from 3 independent replicates.

**A**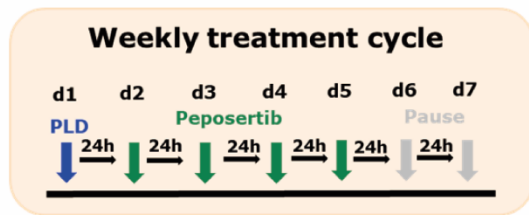**B****Body weight of MDA-MB-231 xenograft**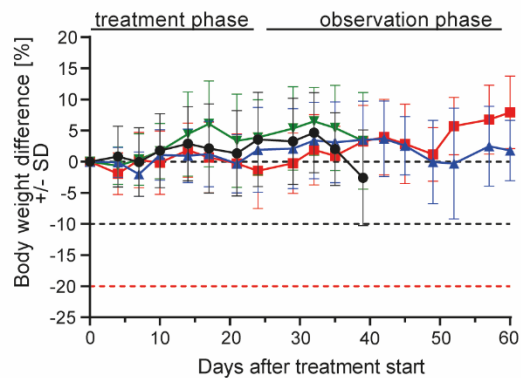**C****Body weight of MX-1 xenograft**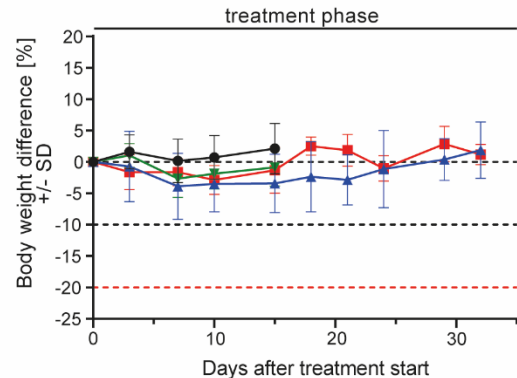

**Suppl. figure S3. Combination treatment of peposertib with PLD in human TNBC xenograft models *in vivo* results in DNA damage accumulation and is well tolerated.** (A) Western blot analysis of tumor lysates obtained from mice harboring MDA-MB-231 xenografts that were treated with PLD or PLD + peposertib. Unless, otherwise indicated, in the combination group, co-treatment with peposertib (twice daily) for four days was started 24h after PLD treatment. Lysates obtained from at least 3 tumors/treatment groups were pooled for this analysis. (B) Scheme of the treatment schedule used in the *in vivo* efficacy studies for PLD + peposertib. Relative body weight changes of (C) MDA-MB-231 and (D) MX-1 tumor-bearing mice throughout the studies.

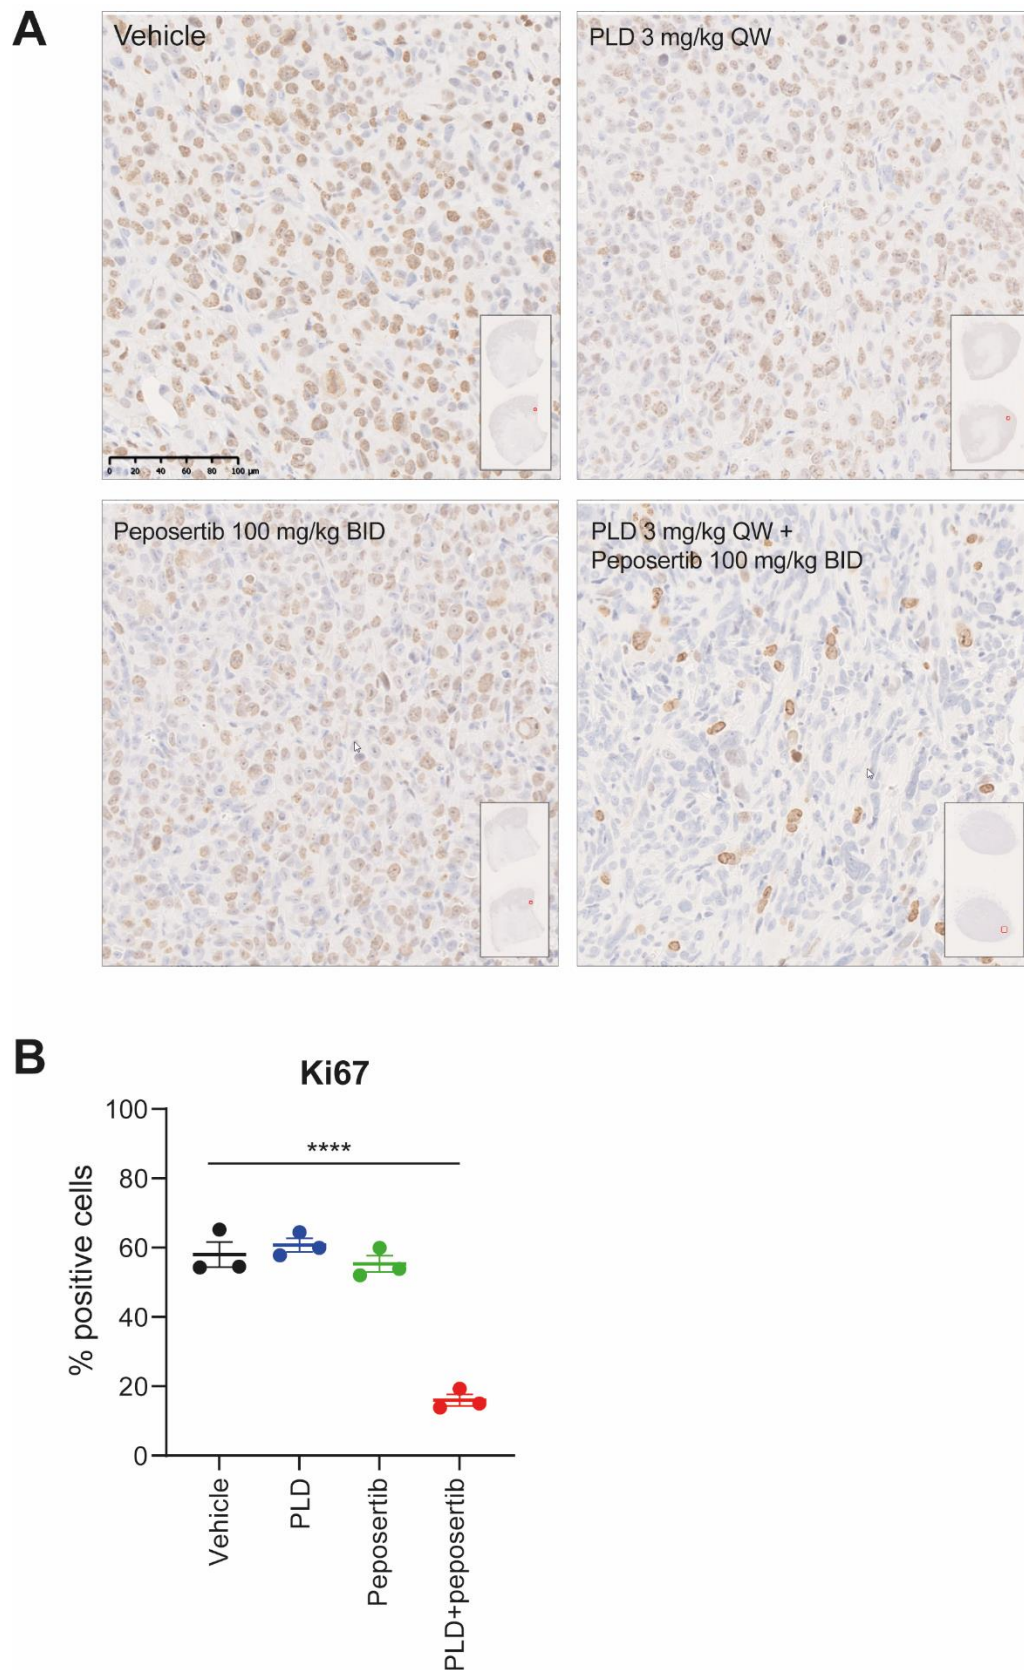

**Suppl. figure S4 Combination treatment reduced Ki67-positive staining in cell-derived xenograft tumors.** (A) Representative Ki67 immunohistochemical staining in MDA-MB-231 xenograft tumors at day 39 apost-treatment and (B) its quantification. Groups were compared by one-way ANOVA followed by Dunn's Multiple Comparison Test using one-way ANOVA.

**Supplementary table S1**

| <b>Cell line</b> | <b>Source</b>         | <b>Culture condition</b>                            |
|------------------|-----------------------|-----------------------------------------------------|
| MDA-MB-231       | ATCC                  | DMEM + 10% FBS                                      |
| MDA-MB-436       | ATCC                  | RPMI 1640 + 10% FBS + Sodium Pyruvate               |
| MDA-MB-468       | ATCC                  | RPMI 1640 + 10% FBS + Sodium Pyruvate + L-Glutamine |
| MX-1             | DCTD Tumor Repository | DMEM/F12 + 7.5% FBS + L-Glutamine                   |
| M059J            | ATCC                  | DMEM/F12 + 10% FBS + L-Glutamine + NEAA             |
| M059K            | ATCC                  | DMEM/F12 + 10% FBS + L-Glutamine + NEAA             |

**Supplementary table S2**

| <b>Antibodies</b>                                     | <b>Usage (dilution)</b> | <b>Source</b>             | <b>Identifier</b> |
|-------------------------------------------------------|-------------------------|---------------------------|-------------------|
| p-H2Ax (S139)                                         | WB (1:2000)             | Sigma Millipore           | 05-636            |
| p21                                                   | WB (1:1000)             | Cell Signaling Technology | 2947              |
| p53                                                   | WB (1:500)              | Santa Cruz                | sc-126            |
| p-p53(Ser15)                                          | WB (1:1000)             | Cell Signaling Technology | 9284              |
| Kap1                                                  | WB (1:1000)             | Cell Signaling Technology | 4124              |
| pKap1 (S824)                                          | WB (1:1000)             | Abcam                     | ab133440          |
| ATM                                                   | WB (1:1000)             | Cell Signaling Technology | 2873              |
| pATM (S1981)                                          | WB (1:1000)             | Cell Signaling Technology | 4526              |
| Vinculin                                              | WB (1:5000)             | Sigma                     | V9131             |
| Goat anti-Mouse IgG (H+L)<br>Secondary Antibody, HRP  | WB (1:5000)             | Invitrogen                | 31430             |
| Goat anti-Rabbit IgG (H+L)<br>Secondary Antibody, HRP | WB (1:5000)             | Invitrogen                | 31460             |
| Ki67 (SP6)                                            | IHC (1:500)             | abcam                     | ab16667           |
| OmniMap anti-rabbit HRP                               | IHC                     | Roche                     | 760-4311          |
